# Supplementary material for: Concurrent BMP Signaling Maintenance and TGF-β Signaling Inhibition Is a Hallmark of Natural Resistance to Muscle Atrophy in the Hibernating Bear
Source: MDPI journal article supplement (doi:10.3390/cells10081873), 2021-07-23
Supplement: s1 [file s1]

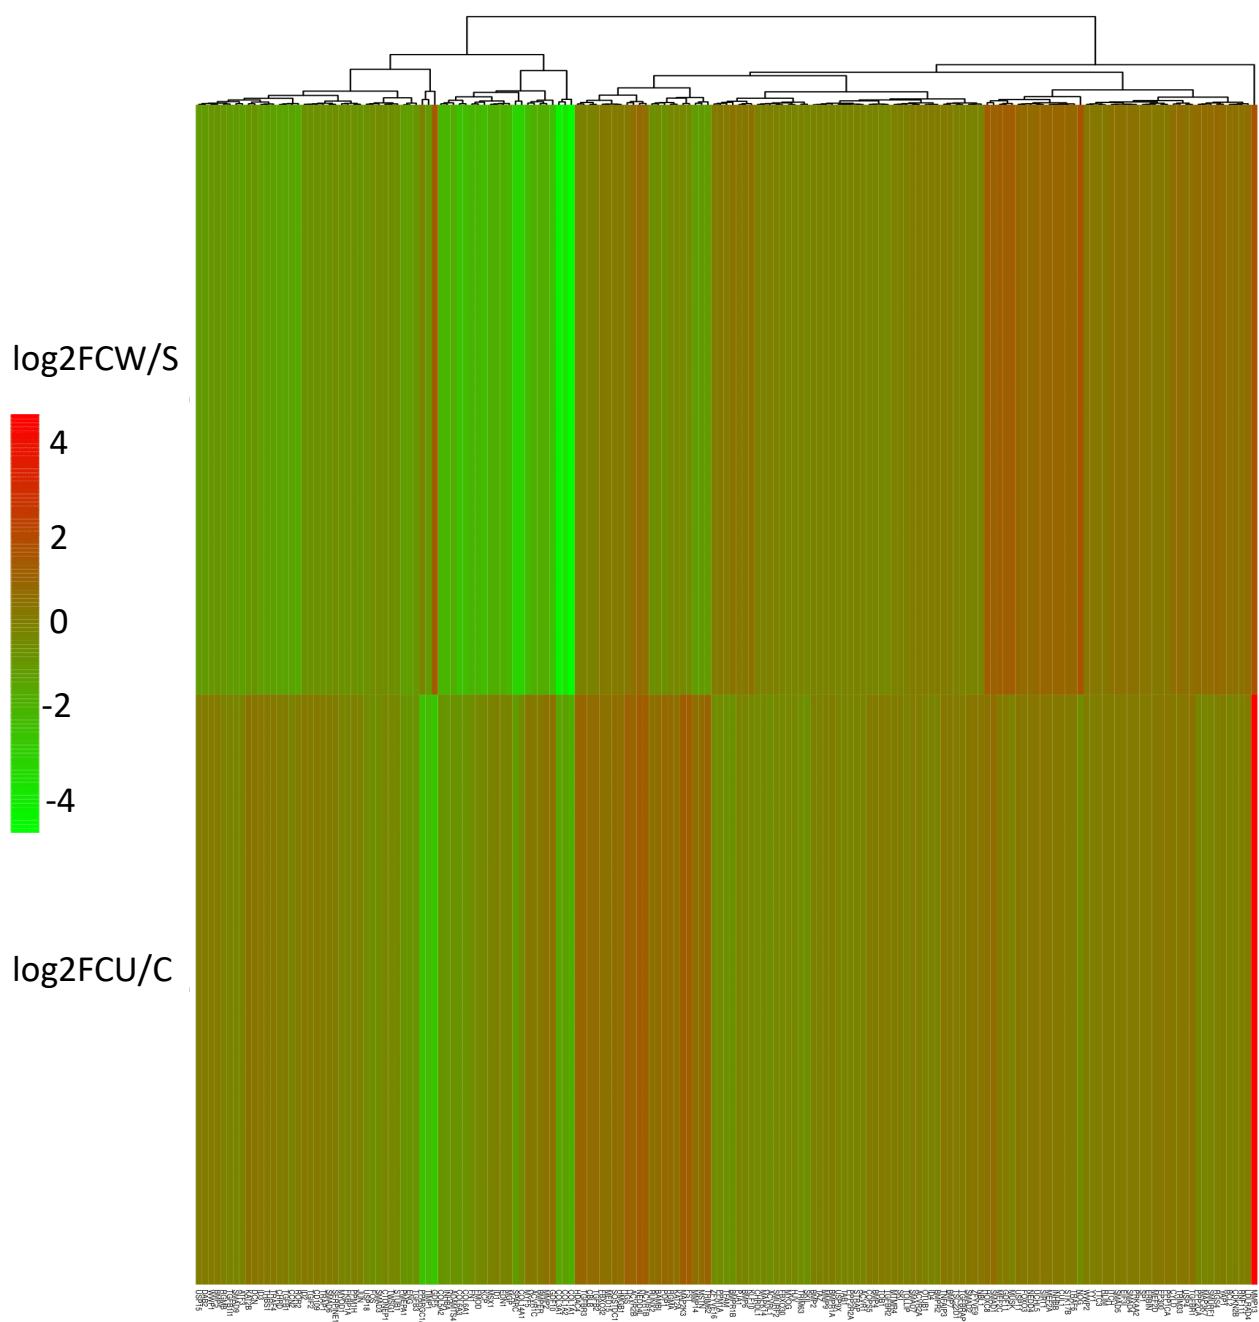

Supplementary Figure S1

**Supplementary Figure 1. The gene expression pattern of TGF- $\beta$  and BMP components is different in brown bear muscle resistant to atrophy during hibernation compared to atrophied muscles of the unloaded mouse.** Heatmap from vastus lateralis muscle of active and hibernating brown bears (n=6 bears/season, the same individuals were sampled and analyzed in summer and winter, log2FCWinter/Summer), and soleus muscle of control and unloaded mice (n=4 mice per condition, log2FC Unloaded/Control) of 171 TGF- $\beta$ /BMP related genes. The green and red colours indicate that the gene expression decreased or increased, respectively, and each line represents one gene.
